# Supplementary material
Source: PubMed Central journal article supplement (PMC5295856)

**Supplemental Table 1.** List of representative differentially expressed genes and their FPKM values in melanocyte and keratinocyte from three different individuals

| Gene                                                            | MEL0    | MEL1    | MEL2    | NHK0     | NHK1     | NHK2     |
|-----------------------------------------------------------------|---------|---------|---------|----------|----------|----------|
| <b>KRT5</b> (Keratin 5, Type II)                                | 0       | 0       | 0       | 8747.22  | 11063.6  | 9280.07  |
| <b>KRT14</b> (Keratin 14, Type I)                               | 0       | 0       | 0       | 5935.6   | 6560.25  | 6846.42  |
| <b>KRT17</b> (Keratin 17, Type I)                               | 0.067   | 0.081   | 0       | 1907.64  | 4594.78  | 5690.6   |
| <b>KRT6A</b> (Keratin 6A, Type II)                              | 0       | 0       | 0       | 1691.96  | 2810.26  | 3101.04  |
| <b>SFN</b> (Stratifin)                                          | 0       | 0.045   | 0.131   | 1794.51  | 2027.98  | 2036.84  |
| <b>FGFBP1</b> (FGF Binding Protein 1)                           | 0       | 0       | 0       | 2417.07  | 2316.18  | 1902.18  |
| <b>LAMC2</b> (Laminin Subunit Gamma-2)                          | 0       | 0.046   | 0.122   | 1586.44  | 1079.68  | 1623.43  |
| <b>LGALS7B</b> (Galectin-7B)                                    | 0       | 0       | 0       | 321.346  | 644.36   | 1535.07  |
| <b>S100A9</b> (S100 Calcium-binding Protein A9)                 | 0       | 0       | 0       | 20.1211  | 875.886  | 1344.96  |
| <b>S100A14</b> (S100 Calcium-binding Protein A14)               | 0.11    | 0       | 0.087   | 1310.28  | 1312.22  | 1325.55  |
| <b>LGALS7</b> (Galectin-7)                                      | 0       | 0       | 0       | 200.039  | 648.022  | 1318.26  |
| <b>S100A8</b> (S100 Calcium-binding Protein A8)                 | 0       | 0       | 0       | 3.9958   | 472.497  | 1062.23  |
| <b>KRT16</b> (Keratin 16, Type I)                               | 0       | 0       | 0       | 261.095  | 523.035  | 804.666  |
| <b>SPRR1B</b> (Small Proline-Rich Protein 1B)                   | 0       | 0       | 0       | 139.581  | 713.213  | 794.896  |
| <b>COL17A1</b> (Type XVII Collagen Alpha-1)                     | 0       | 0       | 0       | 517.048  | 714.398  | 681.263  |
| Gene                                                            | MEL0    | MEL1    | MEL2    | NHK0     | NHK1     | NHK2     |
| <b>PMEL</b> (Premelanosome Protein)                             | 11129.9 | 7590.49 | 7561.95 | 0.278543 | 0.660627 | 0.606171 |
| <b>TYRP1</b> (Tyrosinase-Related Protein 1)                     | 7714.41 | 3934.75 | 5800.6  | 0.013391 | 0        | 0.066389 |
| <b>MLANA</b> (Melan-A)                                          | 3004.16 | 3136.04 | 1181.89 | 0.217386 | 0.210209 | 0.033679 |
| <b>TYR</b> (Tyrosinase)                                         | 1108.37 | 1722.8  | 1734.39 | 0        | 0        | 0        |
| <b>A2M</b> (Alpha-2-Macroglobulin)                              | 820.086 | 945.033 | 1410.8  | 0.008035 | 9.83E-09 | 0.059752 |
| <b>SPP1</b> (Secreted Phosphoprotein 1)                         | 776.796 | 587.117 | 290.461 | 0        | 0        | 0.165868 |
| <b>GMPR</b> (Guanosine Monophosphate Reductase)                 | 501.417 | 220.03  | 275.655 | 0.109443 | 0.151185 | 0.712135 |
| <b>TSPAN10</b> (Tetraspanin 10)                                 | 471.877 | 148.227 | 74.1744 | 0.177637 | 0.504801 | 1.63552  |
| <b>GPR143</b> (G Protein-Coupled Receptor 143)                  | 456.944 | 302.492 | 265.059 | 0.168192 | 0.265533 | 1.25075  |
| <b>CYP27A1</b> (Cytochrome P450 Family 27 Subfamily A Member 1) | 412.853 | 161.323 | 115.655 | 0.856995 | 0.227301 | 0.870979 |
| <b>DCT</b> (Dopachrome Tautomerase)                             | 404.191 | 8.91536 | 62.4922 | 0        | 0        | 0        |
| <b>GYPC</b> (Glycophorin C)                                     | 389.539 | 280.499 | 289.345 | 0        | 0.049086 | 0.110101 |
| <b>OCA2</b> (Oculocutaneous Albinism II)                        | 374.745 | 301.773 | 331.867 | 0.012185 | 0        | 0.030203 |
| <b>SOX10</b> (Sex Determining Region Y-box 10)                  | 359.372 | 273.329 | 273.06  | 0        | 0.014877 | 0        |
| <b>PLP1</b> (Proteolipid Protein 1)                             | 358.99  | 175.59  | 211.511 | 0        | 0.029106 | 0        |

**Supplemental Table 2.** UVR-induced consistent changes in CDKN1A and GDF15 expression (FPKM values) under different UVB conditions in keratinocytes (NHK) and melanocyte (MEL).

|     | Gene   | 4h     |          | 24h    |          | 72h    |         |
|-----|--------|--------|----------|--------|----------|--------|---------|
|     |        | Log FC | p-value  | Log FC | p-value  | Log FC | p-value |
| NHK | CDKN1A | 1.498  | 0.038    | 2.857  | 0.008    | 1.975  | 0.007   |
|     | GDF15  | 5.006  | 0.005    | 5.715  | 0.007    | 3.737  | 0.029   |
| MEL | CDKN1A | 1.976  | 3.62E-06 | 2.43   | 1.82E-05 | 2.043  | 0.001   |
|     | GDF15  | 1.935  | 0.007    | 3.553  | 1.0E-06  | 3.19   | 1.0E-06 |

**Supplemental Table 3.** List of common UVB-responsive genes in melanocyte and keratinocyte lines 24h post 30 mJ/cm<sup>2</sup> of UVR.

| Gene symbol | Entrez ID | M3     |          | M2     |          | NHK2   |          | MHK1   |          | NHK3   |          |
|-------------|-----------|--------|----------|--------|----------|--------|----------|--------|----------|--------|----------|
|             |           | LogFC  | p-value  |
| GDF15       | 9518      | -4.967 | 9.270e-6 | -3.553 | 1.000e-6 | -5.076 | 1.000e-6 | -6.989 | 4.050e-5 | -5.715 | 0.007    |
| TNFRSF10C   | 8794      | -4.447 | 0.003    | -4.173 | 0.001    | -4.770 | 1.110e-4 | -4.813 | 3.075e-4 | -4.846 | 0.011    |
| FDXR        | 2232      | -3.432 | 0.001    | -3.006 | 1.000e-6 | -1.960 | 0.014    | -2.125 | 0.006    | -2.433 | 0.008    |
| TNFRSF10D   | 8793      | -3.137 | 0.003    | -2.103 | 2.734e-4 | -3.812 | 2.310e-6 | -3.724 | 1.590e-6 | -3.026 | 5.664e-4 |
| MDM2        | 4193      | -3.105 | 0.004    | -2.266 | 3.320e-6 | -2.450 | 0.002    | -3.682 | 5.280e-6 | -3.215 | 6.272e-4 |
| NR4A1       | 3164      | -3.037 | 0.003    | -1.520 | 0.002    | -4.301 | 0.002    | -3.461 | 0.003    | -3.727 | 0.008    |
| CDKN1A      | 1026      | -3.022 | 0.009    | -2.430 | 1.820e-5 | -2.105 | 0.020    | -3.075 | 2.997e-4 | -2.857 | 0.008    |
| HIST2H2BE   | 8349      | -2.729 | 0.032    | -2.112 | 0.008    | -3.635 | 9.670e-6 | -5.051 | 1.000e-6 | -3.784 | 0.004    |
| TRIP1       | 51499     | -2.650 | 0.011    | -1.740 | 0.002    | -1.590 | 0.037    | -2.341 | 0.002    | -2.041 | 0.017    |
| SERTAD1     | 29950     | -2.571 | 0.014    | -1.548 | 0.025    | -1.886 | 0.017    | -2.299 | 0.004    | -2.386 | 0.012    |
| TNFAIP3     | 7128      | -2.336 | 0.036    | -1.324 | 0.014    | -1.544 | 0.037    | -1.467 | 0.044    | -2.130 | 0.013    |
| TBCD        | 6904      | -2.019 | 0.043    | -1.221 | 0.017    | -1.657 | 0.031    | -1.876 | 0.014    | -1.825 | 0.030    |
| MYH10       | 4628      | -2.222 | 0.029    | -1.434 | 0.007    | -1.966 | 0.011    | -1.826 | 0.014    | -2.094 | 0.013    |
| NNT         | 23530     | -2.285 | 0.029    | -1.383 | 0.009    | -1.789 | 0.042    | -2.213 | 0.008    | -2.709 | 0.008    |
| ANTXR1      | 84168     | -2.562 | 0.037    | -1.491 | 0.016    | -2.137 | 0.009    | -1.796 | 0.023    | -2.753 | 0.003    |
| LRBA        | 987       | -2.572 | 0.040    | -4.096 | 1.000e-6 | -2.907 | 5.019e-4 | -2.899 | 2.500e-4 | -4.165 | 1.580e-5 |
| SUCLG2      | 8801      | -2.615 | 0.015    | -1.394 | 0.006    | -2.516 | 0.005    | -2.160 | 0.011    | -3.678 | 4.741e-4 |
| MYO1D       | 4642      | -2.702 | 0.010    | -1.281 | 0.007    | -1.621 | 0.032    | -1.745 | 0.021    | -2.783 | 0.001    |
| DIS3L2      | 129563    | -2.818 | 0.026    | -2.088 | 0.003    | -2.404 | 0.026    | -2.428 | 0.017    | -2.614 | 0.035    |
| AP3B1       | 8546      | -2.831 | 0.015    | -1.851 | 0.003    | -1.687 | 0.034    | -1.517 | 0.050    | -2.742 | 0.002    |
| ROBO1       | 6091      | -2.861 | 0.028    | -2.563 | 0.002    | -3.069 | 9.994e-4 | -2.622 | 0.004    | -4.349 | 1.221e-4 |
| KIF4A       | 24137     | -2.900 | 0.036    | -2.371 | 0.016    | -4.327 | 7.890e-5 | -1.914 | 0.027    | -2.103 | 0.031    |
| SERGEF      | 26297     | -2.926 | 0.040    | -2.683 | 0.016    | -3.025 | 0.023    | -2.937 | 0.021    | -3.563 | 0.024    |
| FARP1       | 10160     | -2.974 | 0.004    | -1.524 | 0.004    | -2.727 | 0.004    | -2.205 | 0.020    | -3.446 | 0.003    |
| SND1        | 27044     | -2.981 | 0.003    | -2.186 | 6.220e-6 | -2.052 | 0.006    | -1.650 | 0.022    | -2.948 | 6.291e-4 |
| UTRN        | 7402      | -2.986 | 0.016    | -3.327 | 1.360e-5 | -2.899 | 0.002    | -1.988 | 0.019    | -4.241 | 1.621e-4 |
| RSU1        | 6251      | -3.064 | 0.003    | -2.112 | 7.500e-5 | -2.010 | 0.012    | -2.053 | 0.010    | -3.318 | 4.267e-4 |
| FBXL7       | 23194     | -3.066 | 0.008    | -1.365 | 0.045    | -6.276 | 6.537e-4 | -3.774 | 0.034    | -6.209 | 0.004    |
| ERC1        | 23085     | -3.117 | 0.012    | -2.125 | 0.001    | -1.934 | 0.018    | -2.114 | 0.007    | -2.650 | 0.004    |
| VPS13B      | 157680    | -3.155 | 0.032    | -3.633 | 5.094e-4 | -2.509 | 0.012    | -2.832 | 0.003    | -2.771 | 0.023    |
| DTD1        | 92675     | -3.165 | 0.010    | -1.853 | 0.005    | -2.103 | 0.017    | -2.221 | 0.008    | -3.133 | 8.075e-4 |
| ACACA       | 31        | -3.191 | 0.003    | -1.920 | 0.003    | -2.026 | 0.007    | -1.899 | 0.009    | -2.720 | 0.001    |
| DOCK1       | 1793      | -3.193 | 0.017    | -2.887 | 3.813e-4 | -2.194 | 0.012    | -2.279 | 0.005    | -3.500 | 6.121e-4 |
| PHKB        | 5257      | -3.203 | 0.020    | -1.769 | 0.028    | -2.179 | 0.010    | -1.610 | 0.047    | -2.996 | 0.002    |
| FKBP5       | 2289      | -3.263 | 0.001    | -1.514 | 0.002    | -2.847 | 2.453e-4 | -1.782 | 0.014    | -2.738 | 0.001    |
| SCMH1       | 22955     | -3.268 | 0.014    | -1.836 | 0.029    | -2.781 | 0.009    | -2.335 | 0.017    | -3.408 | 0.005    |
| ITPR2       | 3709      | -3.270 | 0.034    | -4.284 | 7.093e-4 | -3.394 | 9.708e-4 | -2.343 | 0.014    | -3.766 | 0.002    |
| WDR7        | 23335     | -3.279 | 0.015    | -2.424 | 0.006    | -2.556 | 0.031    | -2.861 | 0.007    | -3.262 | 0.021    |
| KLF12       | 11278     | -3.342 | 0.027    | -3.068 | 0.005    | -3.357 | 0.010    | -2.601 | 0.045    | -5.110 | 0.003    |

|          |        |        |          |        |          |        |          |        |          |        |          |
|----------|--------|--------|----------|--------|----------|--------|----------|--------|----------|--------|----------|
| NBAS     | 51594  | -3.401 | 0.004    | -2.575 | 1.319e-4 | -3.171 | 8.759e-4 | -2.292 | 0.008    | -4.099 | 1.596e-4 |
| PDSS2    | 57107  | -3.418 | 0.021    | -2.409 | 0.006    | -2.752 | 0.024    | -2.340 | 0.035    | -3.648 | 0.011    |
| EPB41L2  | 2037   | -3.426 | 0.024    | -2.405 | 0.005    | -2.051 | 0.017    | -2.387 | 0.005    | -3.636 | 2.486e-4 |
| ANO10    | 55129  | -3.442 | 0.002    | -2.205 | 2.918e-4 | -1.956 | 0.037    | -1.859 | 0.039    | -3.287 | 0.002    |
| SCFD2    | 152579 | -3.476 | 0.016    | -4.136 | 1.260e-5 | -4.577 | 4.916e-4 | -3.109 | 0.003    | -4.297 | 0.001    |
| DNAJC1   | 64215  | -3.496 | 0.008    | -2.765 | 0.002    | -2.500 | 0.015    | -2.320 | 0.025    | -3.124 | 0.013    |
| APBB2    | 323    | -3.539 | 0.017    | -2.486 | 0.007    | -2.424 | 0.004    | -1.679 | 0.034    | -2.874 | 0.003    |
| SBF2     | 81846  | -3.562 | 0.017    | -2.732 | 0.004    | -3.082 | 0.002    | -1.822 | 0.040    | -3.775 | 0.001    |
| HLCS     | 3141   | -3.618 | 0.010    | -2.374 | 0.005    | -2.286 | 0.040    | -2.370 | 0.011    | -3.286 | 0.006    |
| GBE1     | 2632   | -3.648 | 0.008    | -2.769 | 1.490e-5 | -2.103 | 0.029    | -1.997 | 0.027    | -3.485 | 0.003    |
| PAR3     | 56288  | -3.660 | 0.011    | -3.629 | 4.015e-4 | -2.541 | 0.004    | -2.136 | 0.010    | -3.402 | 5.969e-4 |
| C11orf49 | 79096  | -3.720 | 0.003    | -2.098 | 0.005    | -2.568 | 0.017    | -2.390 | 0.019    | -2.939 | 0.023    |
| DYM      | 54808  | -3.777 | 0.009    | -2.921 | 3.346e-4 | -3.285 | 0.002    | -2.324 | 0.019    | -3.430 | 0.004    |
| FBXL17   | 64839  | -3.889 | 0.008    | -3.254 | 0.003    | -2.672 | 0.025    | -3.183 | 0.007    | -3.860 | 0.009    |
| KIF20A   | 10112  | -3.985 | 0.004    | -4.657 | 4.000e-5 | -3.787 | 6.220e-5 | -2.208 | 0.009    | -2.616 | 0.007    |
| FTO      | 79068  | -4.043 | 0.002    | -2.807 | 1.332e-4 | -2.485 | 0.010    | -2.854 | 0.002    | -3.430 | 0.002    |
| FAM172A  | 83989  | -4.045 | 0.004    | -2.516 | 0.006    | -4.156 | 0.003    | -3.333 | 0.009    | -6.955 | 1.316e-4 |
| TRAPPC9  | 83696  | -4.092 | 9.468e-4 | -3.849 | 1.000e-6 | -2.764 | 0.028    | -2.455 | 0.028    | -3.692 | 0.009    |
| BRE      | 9577   | -4.120 | 9.806e-4 | -3.126 | 1.680e-5 | -3.008 | 0.004    | -2.300 | 0.016    | -3.080 | 0.009    |
| NCCRP1   | 342897 | -4.129 | 0.001    | -2.368 | 0.024    | -2.129 | 0.024    | -2.558 | 0.008    | -6.113 | 4.140e-5 |
| MSRA     | 4482   | -4.173 | 0.005    | -4.730 | 2.251e-4 | -4.544 | 0.004    | -3.485 | 0.007    | -5.502 | 0.003    |
| ADK      | 132    | -4.189 | 0.008    | -5.089 | 1.480e-6 | -2.590 | 0.002    | -1.858 | 0.016    | -3.353 | 2.547e-4 |
| COMMD10  | 51397  | -4.196 | 0.007    | -4.164 | 2.430e-5 | -3.275 | 0.007    | -2.940 | 0.008    | -4.410 | 0.002    |
| COMMD1   | 150684 | -4.206 | 0.005    | -2.507 | 0.010    | -3.851 | 0.003    | -2.609 | 0.020    | -3.418 | 0.015    |
| STX8     | 9482   | -4.241 | 0.002    | -3.565 | 6.590e-5 | -4.505 | 1.583e-4 | -2.649 | 0.020    | -4.800 | 6.744e-4 |
| CASK     | 8573   | -4.246 | 0.009    | -2.792 | 0.007    | -3.026 | 0.003    | -2.313 | 0.015    | -3.423 | 0.002    |
| ANO4     | 121601 | -4.277 | 0.017    | -3.960 | 5.994e-4 | -2.253 | 0.032    | -1.818 | 0.036    | -2.470 | 0.037    |
| XRCC4    | 7518   | -4.341 | 0.025    | -2.808 | 0.018    | -4.330 | 0.003    | -3.113 | 0.012    | -3.736 | 0.008    |
| FAF1     | 11124  | -4.377 | 0.002    | -3.382 | 1.940e-5 | -3.007 | 0.003    | -2.098 | 0.019    | -3.582 | 0.001    |
| TMEM117  | 84216  | -4.426 | 4.287e-4 | -3.725 | 5.920e-5 | -4.517 | 0.005    | -3.255 | 0.011    | -4.200 | 0.015    |
| FARS2    | 10667  | -4.469 | 0.010    | -5.266 | 3.880e-5 | -3.334 | 0.006    | -3.201 | 0.007    | -3.595 | 0.011    |
| ELP4     | 26610  | -4.510 | 0.025    | -4.025 | 0.001    | -3.238 | 0.013    | -2.399 | 0.046    | -4.102 | 0.008    |
| C16orf45 | 89927  | -4.521 | 0.004    | -2.830 | 0.003    | -3.207 | 0.013    | -3.768 | 0.008    | -3.237 | 0.031    |
| DENND1A  | 57706  | -4.570 | 0.005    | -4.218 | 7.912e-4 | -3.137 | 0.007    | -2.866 | 0.012    | -4.975 | 5.422e-4 |
| NUBP1    | 80224  | -4.612 | 0.010    | -2.934 | 0.008    | -2.989 | 0.010    | -2.800 | 0.009    | -4.643 | 8.411e-4 |
| ARL15    | 54622  | -4.635 | 0.019    | -3.870 | 0.004    | -3.490 | 0.005    | -2.514 | 0.048    | -3.736 | 0.016    |
| SLC2A13  | 114134 | -4.684 | 0.001    | -2.949 | 0.002    | -3.669 | 0.018    | -3.958 | 0.013    | -4.215 | 0.036    |
| TBC1D5   | 9779   | -4.687 | 7.410e-5 | -3.969 | 1.000e-6 | -3.804 | 6.090e-5 | -2.448 | 0.005    | -4.818 | 5.960e-6 |
| SNX29    | 92017  | -4.701 | 0.001    | -2.950 | 0.003    | -2.784 | 0.012    | -3.561 | 3.176e-4 | -4.357 | 5.350e-4 |
| BCAS3    | 54828  | -4.898 | 9.280e-5 | -2.974 | 3.340e-5 | -4.354 | 0.003    | -3.250 | 0.018    | -4.457 | 0.008    |
| LARGE    | 9215   | -5.028 | 2.197e-4 | -4.897 | 1.000e-6 | -4.119 | 0.006    | -4.102 | 0.004    | -6.234 | 0.001    |
| XYLT1    | 64131  | -5.158 | 0.022    | -4.187 | 0.003    | -2.829 | 0.024    | -3.206 | 0.002    | -3.969 | 0.006    |
| CDKAL1   | 54901  | -5.217 | 0.009    | -3.876 | 0.001    | -2.736 | 0.036    | -2.986 | 0.016    | -3.369 | 0.023    |
| EXOC4    | 60412  | -5.241 | 1.470e-5 | -3.903 | 1.000e-6 | -3.442 | 1.939e-4 | -3.160 | 3.518e-4 | -4.447 | 7.150e-5 |
| ATG10    | 83734  | -5.351 | 0.015    | -3.715 | 0.008    | -3.104 | 0.044    | -3.073 | 0.047    | -4.198 | 0.019    |
| LPP      | 4026   | -5.351 | 2.370e-5 | -3.234 | 2.610e-6 | -3.167 | 2.424e-4 | -2.628 | 9.884e-4 | -3.994 | 1.171e-4 |
| PRKCA    | 5578   | -5.375 | 2.885e-4 | -4.192 | 1.420e-5 | -4.107 | 0.006    | -2.745 | 0.023    | -4.599 | 0.008    |
| GPHN     | 10243  | -5.426 | 8.728e-4 | -6.132 | 1.000e-6 | -3.860 | 9.580e-4 | -3.790 | 2.098e-4 | -4.639 | 4.281e-4 |
| CAMKMT   | 79823  | -5.553 | 0.004    | -5.018 | 3.253e-4 | -4.959 | 0.007    | -3.150 | 0.036    | -3.732 | 0.043    |
| CNTN1    | 1272   | -5.624 | 0.030    | -6.057 | 0.006    | -2.900 | 0.003    | -2.836 | 0.001    | -3.982 | 4.550e-5 |
| GTDC1    | 79712  | -5.646 | 0.008    | -4.173 | 6.903e-4 | -4.290 | 0.002    | -2.808 | 0.043    | -5.472 | 0.003    |
| BBS9     | 27241  | -5.740 | 0.001    | -3.622 | 0.002    | -3.362 | 0.014    | -3.799 | 0.012    | -4.753 | 0.010    |
| TTC28    | 23331  | -5.943 | 0.001    | -5.529 | 3.258e-4 | -3.637 | 0.015    | -5.858 | 0.004    | -4.751 | 0.006    |
| GMDS     | 2762   | -6.713 | 3.729e-4 | -4.768 | 7.730e-5 | -3.771 | 0.001    | -3.493 | 0.002    | -4.585 | 4.392e-4 |
| SMYD3    | 64754  | -6.791 | 5.190e-5 | -4.031 | 9.600e-5 | -4.000 | 0.004    | -3.233 | 0.014    | -6.356 | 4.224e-4 |
| CPS1     | 1373   | -7.201 | 9.301e-4 | -3.373 | 0.003    | -4.432 | 1.190e-5 | -3.586 | 7.079e-4 | -5.270 | 8.360e-5 |

**Supplemental Table 4.** UVR-induced changes in the level of p53 gene expression

(FPKM values) under different UVB conditions in three individual keratinocyte lines (K)

and two melanocyte (M) lines.

|    | Con    | 10 mJ/cm <sup>2</sup><br>24h | 20 mJ/cm <sup>2</sup><br>24h | 30 mJ/cm <sup>2</sup><br>24h | 10 mJ/cm <sup>2</sup><br>72h | 20 mJ/cm <sup>2</sup><br>72h | 30 mJ/cm <sup>2</sup><br>72h |
|----|--------|------------------------------|------------------------------|------------------------------|------------------------------|------------------------------|------------------------------|
| K1 | 20.043 | 36.783                       | 32.145                       | 24.923                       | 36.638                       | 30.12                        | 22.578                       |
| K2 | 31.027 | 29.054                       | 31.385                       | 30.15                        | 24.496                       | 19.689                       | 17.84                        |
| K3 | 28.599 | 28.559                       | 29.264                       | 20.68                        | 23.065                       | 18.522                       | 14.205                       |
| M2 | 26.133 | 22.586                       | 26.496                       | 35.437                       | 17.462                       | 14.711                       | 18.512                       |
| M3 | 17.932 | 32.651                       | 36.06                        | 34.706                       | 15.06                        | 16.381                       | 20.238                       |

**Supplemental Figure 1.** GO analysis using DAVID or ToppGene software suites showing that genes more highly expressed in keratinocytes than in melanocytes fall into keratinocyte-specific biological pathways.

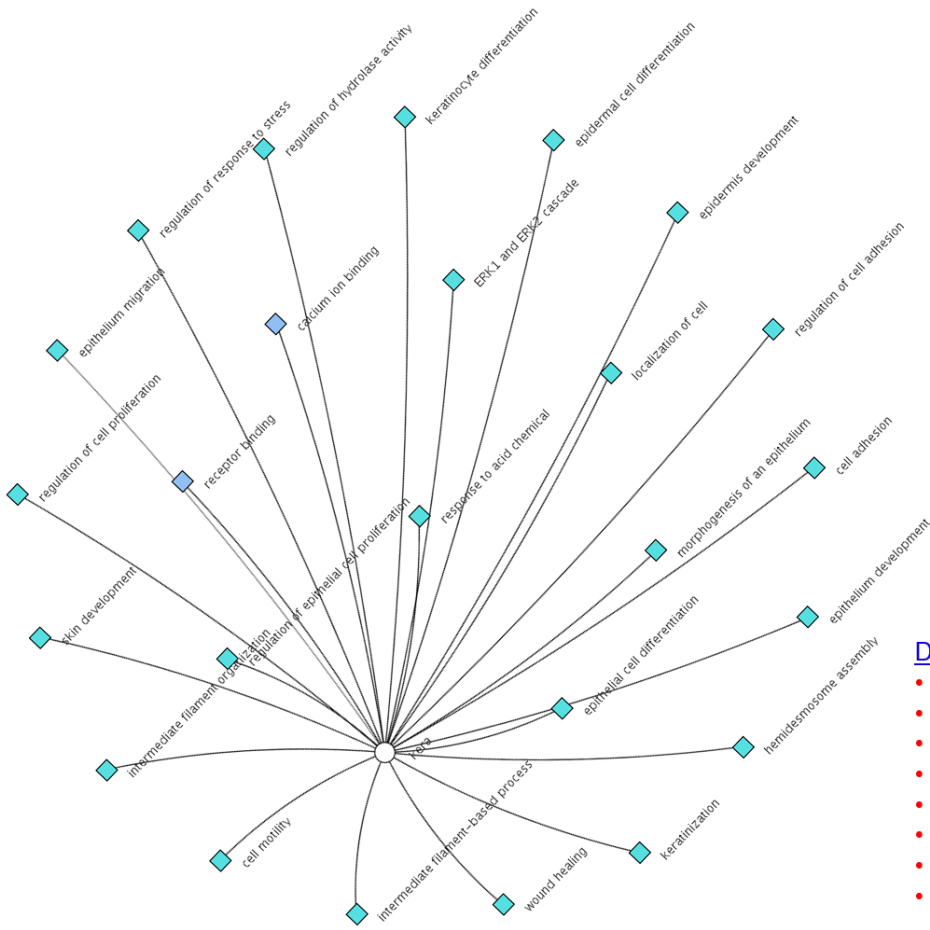

- DAVID GO terms:
- Desmosome
  - Epidermis development
  - Keratinocyte proliferation
  - Epithelial cell differentiation
  - Epidermolysis bullosa
  - Palmoplantar keratoderma
  - Ectodermal dysplasia
  - Basement membrane

**Supplemental Figure 2.** GO analysis using DAVID or ToppGene software suites showing that genes more highly expressed in melanocytes than in keratinocytes fall into melanocyte-specific biological pathways.

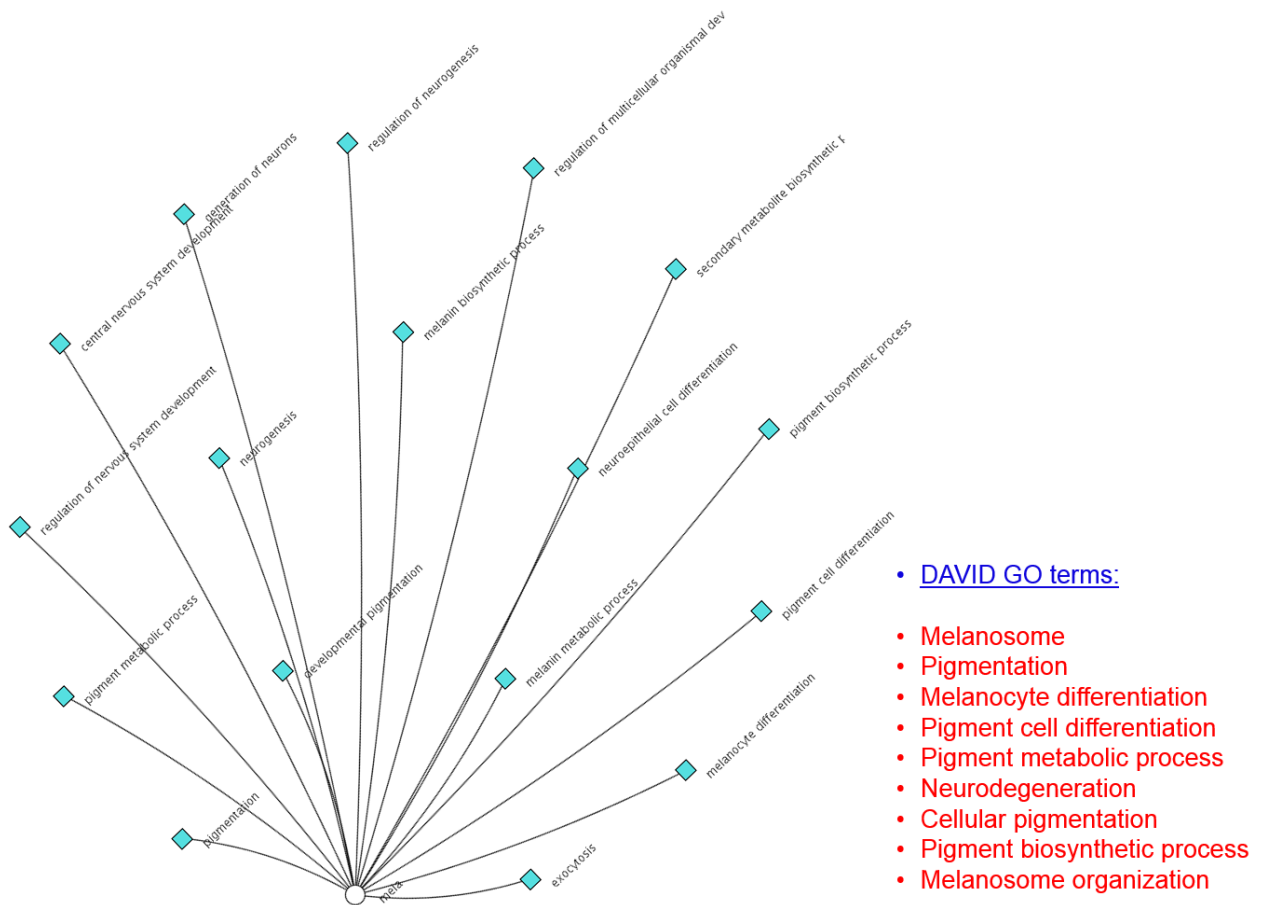

**Supplemental Figure 3.** UVB-induced DEG set at 4h had minimal overlap with DEG sets at 24h or 72h, whereas the overlap between 24h and 72h UVB-induced DEG sets is much larger in both melanocytes and keratinocytes in response to two different UVB doses (10 and 20 mJ/cm<sup>2</sup>).

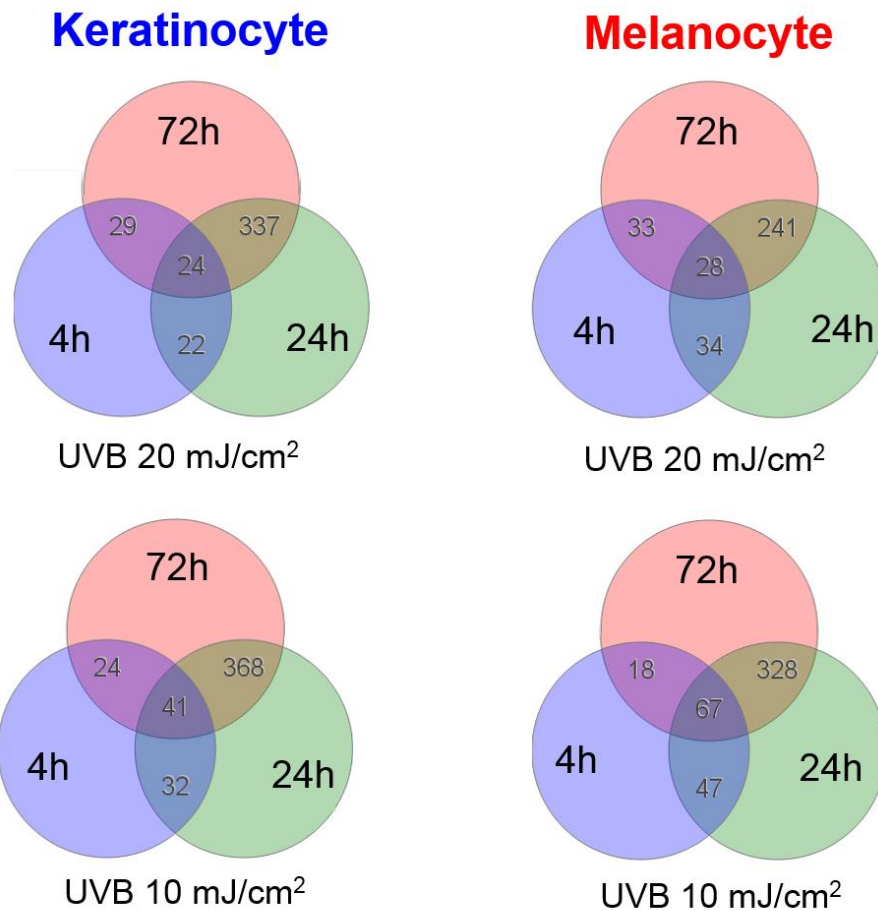



**Supplemental Figure 4A.** UVB induced dysregulation of p53 target genes in keratinocytes 24h post 30mJ/cm<sup>2</sup> of UVR.

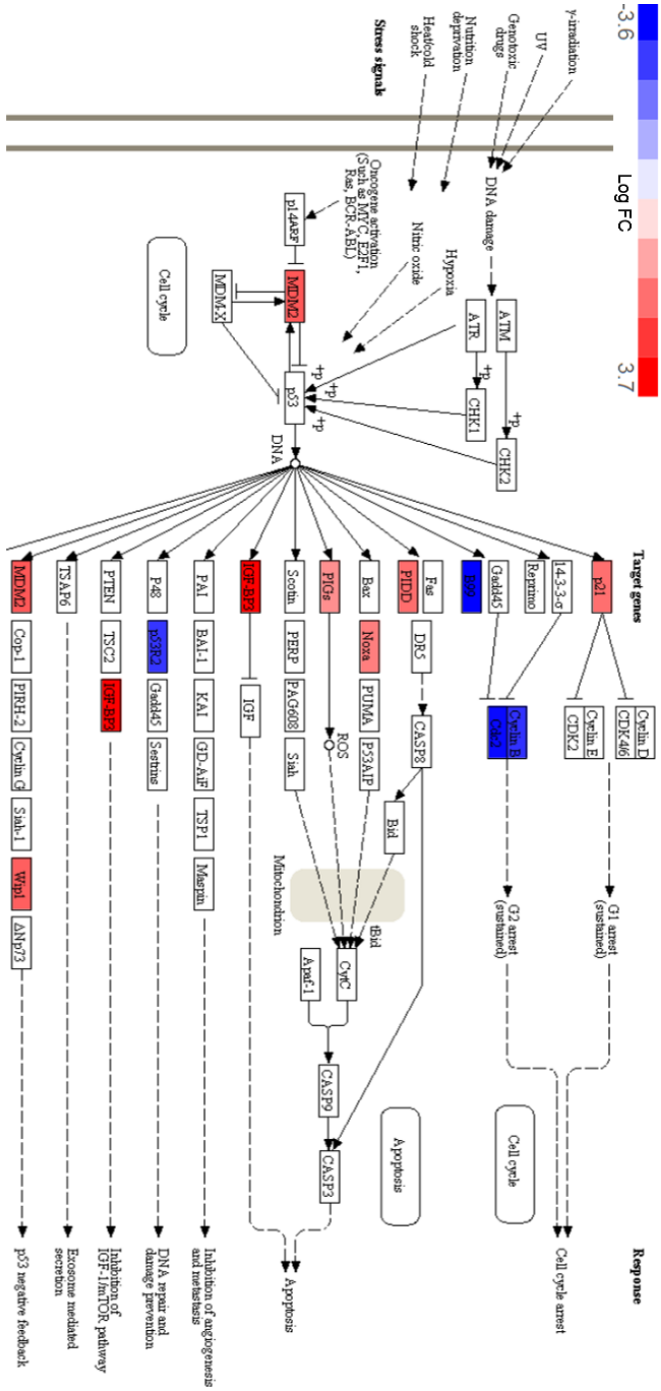

**Supplemental Figure 4B.** UVB induced dysregulation of p53 target genes in melanocytes 24h post 30mJ/cm<sup>2</sup> of UVR.

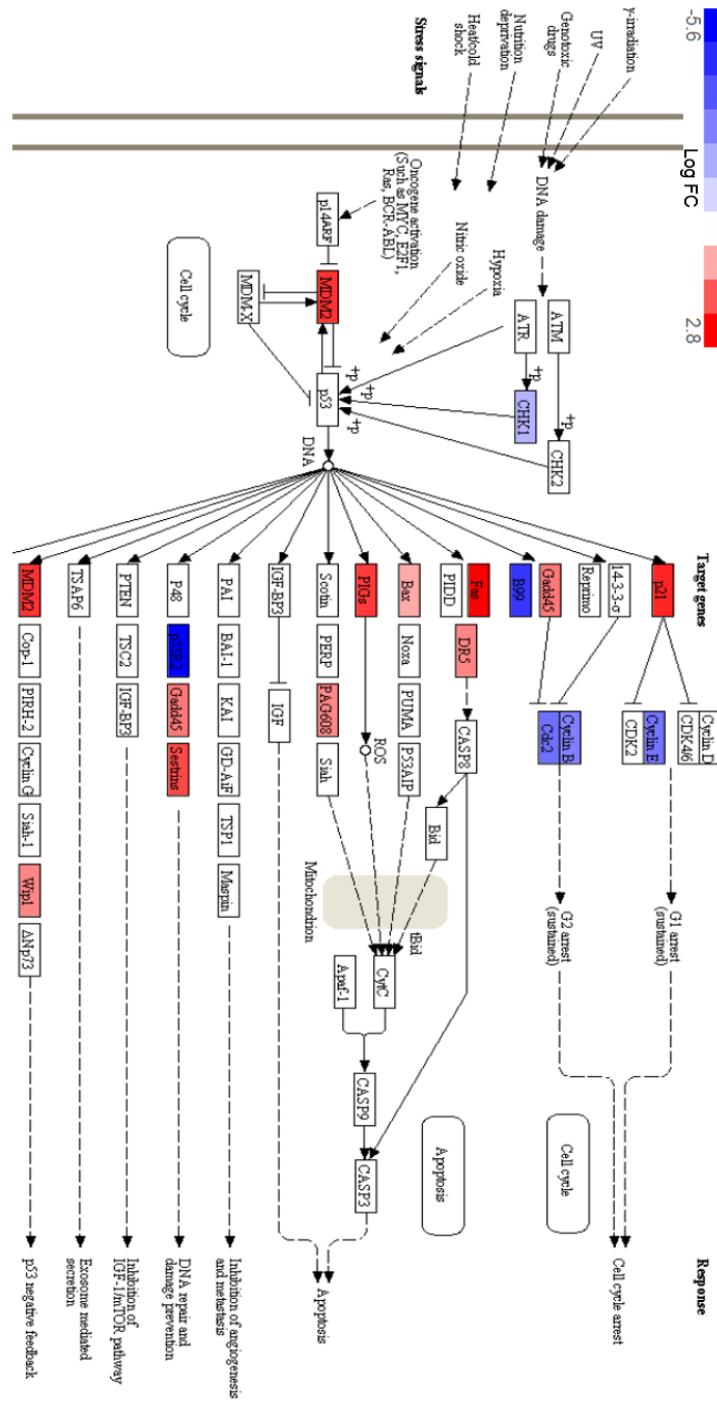

Supplement: NIHMS825538-supplement-supplemental_files.pdf [file NIHMS825538-supplement-supplemental_files.pdf]
